# Supplementary material
Source: PubMed Central journal article supplement (PMC6541000)
Supplement: NIHMS1031031-supplement-1.pdf [file NIHMS1031031-supplement-1.pdf]

**Appendix Exhibit A1: Adjusted Switching to FFS in 2014-2015 by high need and state consumer protection status**

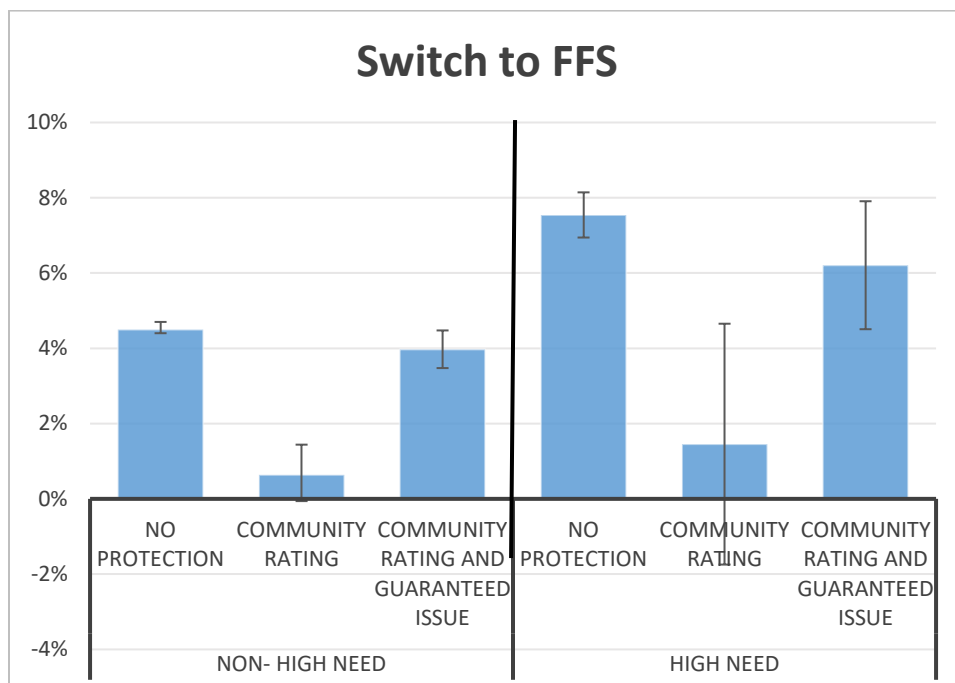

**Source:** Author’s analysis of 2014-2016 Medicare Beneficiary Summary data.

**Notes:** Switch percentages are means across states adjusted for patient characteristics using a linear probability model. Error bars represent 95% confidence intervals. The differences between high-need states, and state protection status are all statistically significant at the <0.05 level. A separate model is fit for guaranteed issue and for community rating. Community Rating states are Minnesota, Vermont, and Washington. Community Rating and Guaranteed Issue States are New York, Maine, Massachusetts, and Connecticut.

**Appendix Exhibit A2: Adjusted Switching to FFS by Beneficiary Characteristic**

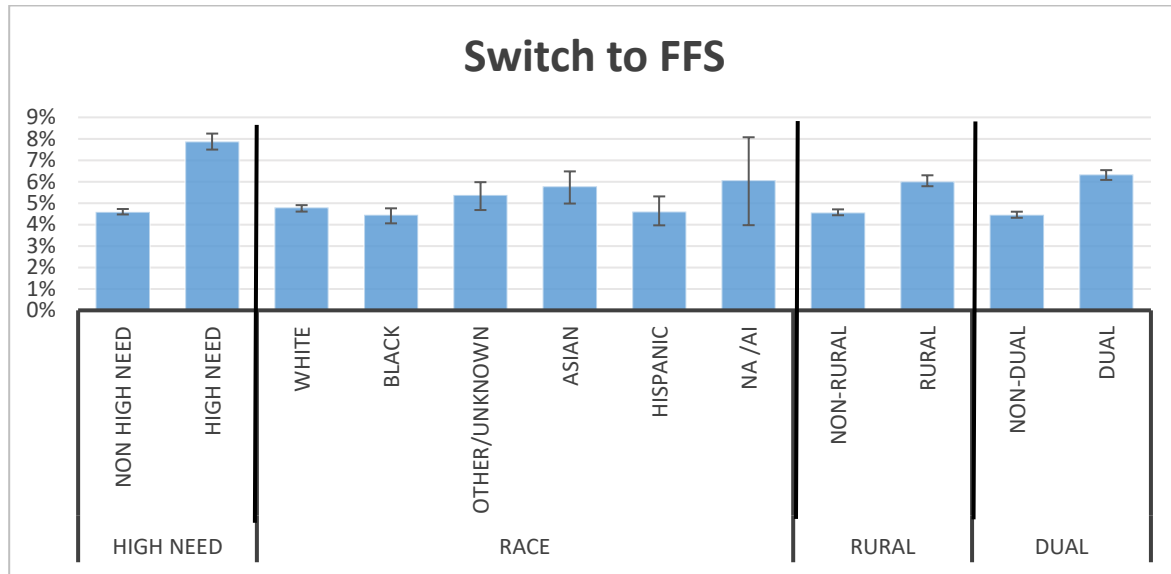

**Source:** Author’s analysis of 2014-2016 Medicare Beneficiary Summary data.

**Notes:** Percentages are means across states adjusted for patient characteristics using a linear probability model. Error bars represent 95% confidence intervals. All differences are statistically significant at the <0.001 level using robust standard errors.

**Appendix Exhibit A3: Medicare Advantage Disenrollment Rates in 2014/2015 by state and high need status**

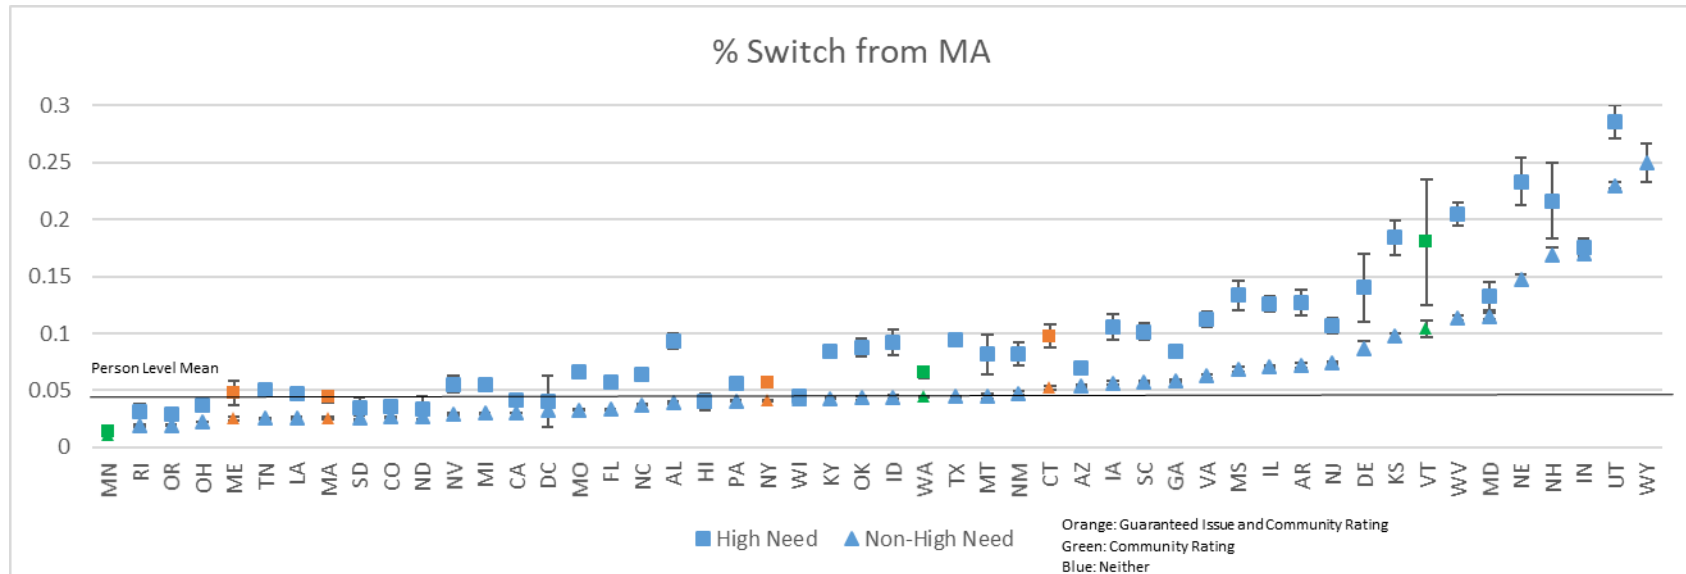

**Notes:** High Need Refers to high need individuals in a state and non-high need refers to non-high need individuals within a state. All values are unadjusted re-enrollment rates by state. Horizontal lines represent person-level mean. Squares represent high need rates, triangles represent non-high need rates. Orange points are states with community rating and guaranteed issue. Green points are states with only community rating. Blue points are states with no additional consumer protections. Wyoming High Need Disenrollment is not shown (53%)

**Appendix Exhibit A4: Medicare Advantage Re-Enrollment Rates in 2016 Among Beneficiaries Who Disenrolled from Medicare Advantage Plans in 2015, by State and Health Needs**

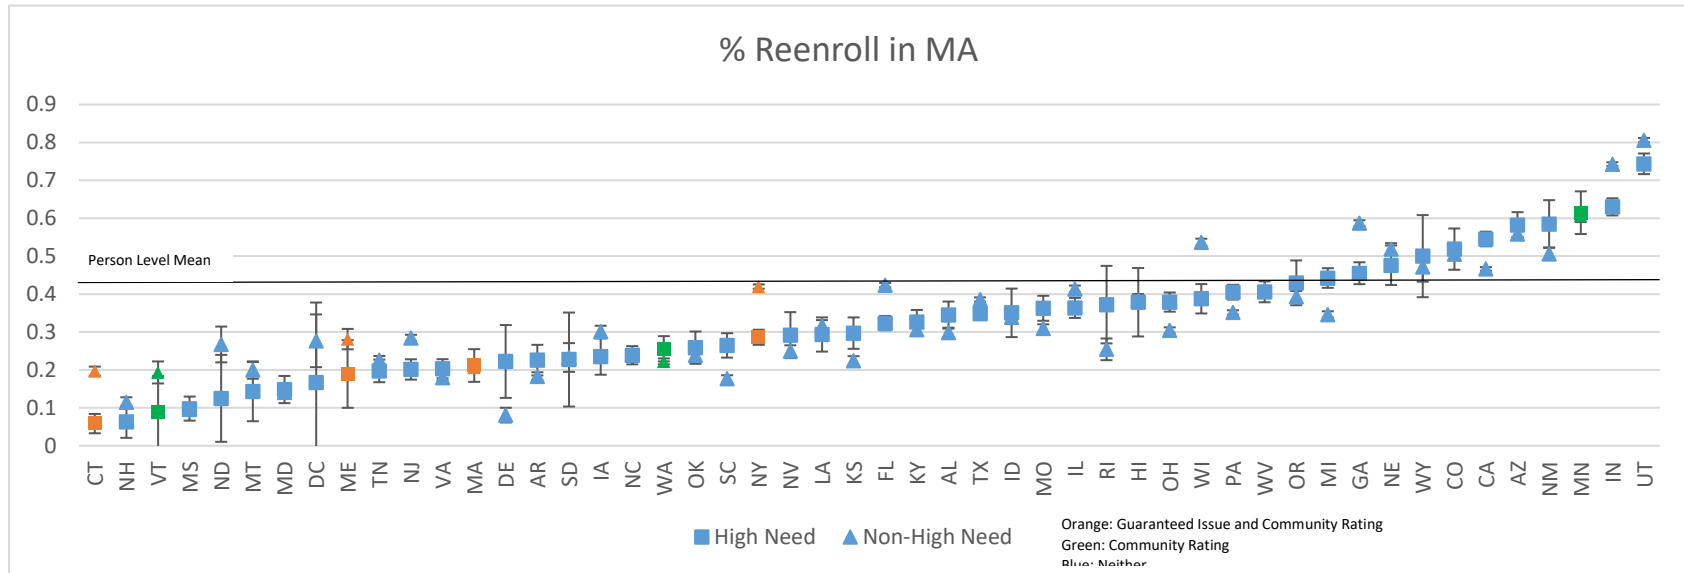

**Notes:** High Need Refers to high need individuals in a state and non-high need refers to non-high need individuals within a state. All values are unadjusted re-enrollment rates by state. Horizontal lines represent person-level mean. Orange points are states with community rating and guaranteed issue. Green points are states with only community rating. Blue points are states with no additional consumer protections.

**Appendix Exhibit A5: Full and sensitivity regression results**

| VARIABLES                           | Full Sample                |                           | Northeast States           |                           |
|-------------------------------------|----------------------------|---------------------------|----------------------------|---------------------------|
|                                     | Switching                  | Re-enrollment             | Switching                  | Reenrollment              |
| High Need                           | 0.0304***<br>(0.000405)    | -0.00375<br>(0.00298)     | 0.0220***<br>(0.00111)     | 0.0630***<br>(0.00875)    |
| Community Rating                    | -0.0386***<br>(0.000269)   | -0.0975***<br>(0.00406)   | 0.0236***<br>(0.00388)     | 0.0681***<br>(0.0160)     |
| Guaranteed Issue                    | -0.00526***<br>(0.000217)  | -0.0799***<br>(0.00269)   | -0.0113***<br>(0.000325)   | 0.0147***<br>(0.00352)    |
| Highneed X Community Rating         | -0.0223***<br>(0.00113)    | 0.0913***<br>(0.0172)     | 0.0495*<br>(0.0286)        | -0.102*<br>(0.0574)       |
| High Need X Guaranteed Issue        | -0.00810***<br>(0.00120)   | -0.0891***<br>(0.00937)   | 0.00148<br>(0.00158)       | -0.136***<br>(0.0124)     |
| Female                              | 0.00274***<br>(0.000131)   | 0.0165***<br>(0.00150)    | 0.00168***<br>(0.000309)   | 0.0171***<br>(0.00333)    |
| Black (ref=white)                   | -0.00786***<br>(0.000229)  | -0.000210<br>(0.00284)    | 0.00215***<br>(0.000554)   | 0.170***<br>(0.00644)     |
| Other/Unknown                       | 0.00489***<br>(0.000376)   | 0.0252***<br>(0.00430)    | 0.0110***<br>(0.00101)     | 0.112***<br>(0.00909)     |
| Asian                               | 0.00129***<br>(0.000456)   | 0.0475***<br>(0.00595)    | 0.00597***<br>(0.00142)    | 0.198***<br>(0.0138)      |
| Hispanic                            | -0.00266***<br>(0.000538)  | 0.171***<br>(0.00745)     | 0.0119***<br>(0.00190)     | 0.228***<br>(0.0175)      |
| Native American/<br>American Indian | 0.00515***<br>(0.00181)    | -0.0587***<br>(0.0154)    | 0.0166*<br>(0.00903)       | 0.131<br>(0.0814)         |
| Age                                 | -0.000767***<br>(1.02e-05) | -0.00468***<br>(0.000110) | -0.00109***<br>(2.33e-05)  | -0.00692***<br>(0.000251) |
| State MA penetration                | -0.00150***<br>(1.02e-05)  | 0.00468***<br>(8.22e-05)  | -0.000963***<br>(2.28e-05) | 0.00729***<br>(0.000165)  |
| Rural Status                        | 0.0161***<br>(0.000199)    | -0.0528***<br>(0.00176)   | 0.00747***<br>(0.000477)   | -0.00925*<br>(0.00473)    |
| Constant                            | 0.147***<br>(0.000830)     | 0.615***<br>(0.00866)     | 0.159***<br>(0.00201)      | 0.561***<br>(0.0193)      |
| R-squared                           | 0.007                      | 0.021                     | 0.004                      | 0.049                     |

Robust standard errors in parentheses

\*\*\* p<0.01, \*\* p<0.05, \* p<0.1
